# Supplementary material for: Surveillance systems to monitor antimicrobial resistance in Neisseria gonorrhoeae: a global, systematic review, 1 January 2012 to 27 September 2020
Source: PubMed Central journal article supplement (PMC9074396; doi:10.2807/1560-7917.es.2022.27.18.2100917), 2022-05-05
Supplement: 21-00917_MEDLAND_Supplement.pdf [file 21-00917_MEDLAND_Supplement.pdf]

This supplementary material is hosted by *Eurosurveillance* as supporting information alongside the article “Surveillance systems to monitor antimicrobial resistance in *Neisseria gonorrhoeae*: a global, systematic review” on behalf of the authors, who remain responsible for the accuracy and appropriateness of the content. The same standards for ethics, copyright, attributions and permissions as for the article apply. Supplements are not edited by *Eurosurveillance* and the journal is not responsible for the maintenance of any links or email addresses provided therein

**Supplementary Table S1** Antimicrobial Resistance Surveillance System Core Components Checklist: Data extracted for review (WHO 2005) (1)

| <b>Field</b>                                                                                                            | <b>Data extracted</b>                                                                                                                                                                            |
|-------------------------------------------------------------------------------------------------------------------------|--------------------------------------------------------------------------------------------------------------------------------------------------------------------------------------------------|
| Bibliographic information                                                                                               | Title, author, year of publication                                                                                                                                                               |
| Country or region covered                                                                                               | For example, Thailand (country) or South East Asia (region)                                                                                                                                      |
| Type of surveillance                                                                                                    | Comprehensive (all health-care providers/labs), sentinel/targeted (sites chosen based on specified criteria) or other (not clear how sites were chosen)                                          |
| Surveillance system components                                                                                          |                                                                                                                                                                                                  |
| <i>Population under surveillance</i>                                                                                    | Male or female; symptomatic or laboratory-confirmed gonorrhoea patients                                                                                                                          |
| <i>Geographic coverage</i>                                                                                              | National (country-wide) or sub-national (selected states or provinces within a country). Systems were classified as national if 50% or more of all states or provinces in country were included. |
| <i>Sampling of patients</i>                                                                                             | Convenience, consecutive, other                                                                                                                                                                  |
| <i>Period of time over which data are collected</i>                                                                     | For example, 2011 to 2015                                                                                                                                                                        |
| <i>Where isolates are collected</i>                                                                                     | STI clinics, other health services                                                                                                                                                               |
| <i>Number and percentage of total gonorrhoea cases with isolates tested for antimicrobial resistance</i>                | Number and percentage of total reported gonorrhoea cases with isolates tested for antimicrobial resistance                                                                                       |
| <i>Patient data collected</i>                                                                                           | Demographic, epidemiological, clinical                                                                                                                                                           |
| <i>Anatomical site of specimens</i>                                                                                     | Male anogenital (urethral, rectal), female anogenital (cervical, rectal, urethral, vaginal), male or female non-anogenital (e.g. pharyngeal)                                                     |
| <i>Type of laboratory testing performed</i>                                                                             | AGAR dilution, E-test, disk diffusion, b-lactamase production, NG-MAST typing, molecular typing                                                                                                  |
| <i>Type of laboratory system</i>                                                                                        | Centralised (only one central laboratory contributes data to the surveillance system) or decentralised (data from participating laboratories sent to a central site for collation and analysis)  |
| <i>Drugs tested for antimicrobial-resistant gonorrhoea</i>                                                              | Cefixime, ceftriaxone, azithromycin, ciprofloxacin, penicillin, tetracycline, spectinomycin, other                                                                                               |
| <i>Guidelines used as reference in determining minimum inhibitory concentration (MIC) breakpoints or susceptibility</i> | Clinical and Laboratory Standards Institute (CLSI), European Committee on Antimicrobial Susceptibility Testing (EUCAST), Calibration, Dichotomy and Susceptibility (CDS) test or other           |

1 **Supplementary Table S2a** System type, coverage, target population, sampling frame and collection sites for included country surveillance systems.

| Country/Region                          | System Type   | Coverage                                                                                                                                      | Population                                                                                                                    | Sampling                    | Where isolates are collected                                                           |
|-----------------------------------------|---------------|-----------------------------------------------------------------------------------------------------------------------------------------------|-------------------------------------------------------------------------------------------------------------------------------|-----------------------------|----------------------------------------------------------------------------------------|
| <b>WHO Africa Region</b>                |               |                                                                                                                                               |                                                                                                                               |                             |                                                                                        |
| Ghana (2)                               | Other         | Subnational – 3 outpatient military clinics in Takordia (port city), 37 military hospitals in Accra (capital city)                            | Patients aged 12 years or older who meet symptomatic NG case definition (i.e discharge)                                       | Convenience                 | Military clinics and hospitals                                                         |
| Kenya (3)                               | Other         | Subnational – 1 site in Nairobi (capital city)                                                                                                | Women with vaginal/cervical discharge                                                                                         | NA                          | Sex Worker Outreach Project clinic                                                     |
| South Africa (4, 5)                     | Sentinel      | Subnational – more than one sentinel clinic, in at least two sites – Johannesburg and Guateng province, precise locations unknown             | Patients with urethral or vagina/cervical discharge                                                                           | Consecutive                 | Primary health care services                                                           |
| Zimbabwe (6)                            | Sentinel      | Subnational – 2 health centres in Harare and 2 in Bulawayo (major cities), 1 health centre in Beit Bridge (close to border with South Africa) | Men 18 years or older with visible urethral discharge, who provided consent                                                   | NA                          | Health centres                                                                         |
| Côte d'Ivoire (7)                       | Sentinel      | National- 8 sentinel sites in the Abidjan, and 6 sentinel sites across country representing a national STD network                            | Patients with gonorrhoea, including asymptomatic, with a focus on symptomatic men and their sexual partners                   |                             | Not specified                                                                          |
| <b>WHO Americas Region</b>              |               |                                                                                                                                               |                                                                                                                               |                             |                                                                                        |
| Argentina (8)                           | Other         | National – 70 hospitals in 20 out of 24 provinces in Argentina                                                                                | NA                                                                                                                            | NA                          | Hospitals                                                                              |
| Brazil (9)                              | Sentinel      | National – 7 sites that represent all 5 regions (2 South East, 2 South, 1 North, 1 North-East, 1 Center-West)                                 | Men 18 years of older with urethral discharge, excluded if treated with antibiotics in the past week or partner of index case | NA                          | Dermatology and STD clinics, hospitals                                                 |
| Canada (10, 11)                         | Comprehensive | National                                                                                                                                      | NA                                                                                                                            | NA, (systematic in Alberta) | Not specified                                                                          |
| USA (12-15)                             | Sentinel      | Subnational - 27 clinic sites across 24 state and city health departments weighted towards western states/port cities                         | First 25 men presenting each month with gonococcal urethritis                                                                 | Consecutive                 | STD clinics                                                                            |
| USA (eGISP)(15, 16)                     | Sentinel      | Subnational -12 clinic sites across 9 state and city health departments                                                                       | First 25 men and 25 women each month: urethral/urine, pharyngeal, rectal, vaginal and/or endocervical sites.                  | Consecutive                 | STD clinics                                                                            |
| USA (SURRG)(15)                         | Sentinel      | Subnational – 8 clinic sites across 8 state and city health departments                                                                       | Extend to recruit community non-STD clinics doing STD testing of patients to collect specimens for GC culture testing         | Consecutive                 | STD clinics and non-STD clinics (e.g family planning clinics and emergency department) |
| <b>WHO Eastern Mediterranean Region</b> |               |                                                                                                                                               |                                                                                                                               |                             |                                                                                        |
| Morocco (17)                            | Sentinel      | National - five cities situated in north, central, west and south Morocco                                                                     | Men with urethral discharge                                                                                                   | NA                          | Basic health services                                                                  |
| <b>WHO Europe Region</b>                |               |                                                                                                                                               |                                                                                                                               |                             |                                                                                        |
| Austria (18)                            | Other         | National – 40 sites across 8 states                                                                                                           | NA                                                                                                                            | NA                          | Diagnostic centers established for surveillance                                        |
| Belarus (19)                            | Sentinel      | Subnational – 1 in Minsk (capital), 1 in Mogilev Regional, 1 in Vitebsk Regional (regions)                                                    | Patients with culture positive gonorrhoea                                                                                     | Mainly consecutive          | Dermato-venereological dispensaries                                                    |
| England and Wales (GRASP) (20, 21)      | Sentinel      | Subnational - 23 English and 2 Welsh Genitourinary Medicine (GUM) clinics                                                                     | Any patient with gonorrhoea presenting between July and September each year                                                   | Consecutive for 3/12        | GUM clinics                                                                            |
| England and Wales (SGSS) (22, 23)       | Comprehensive | National                                                                                                                                      | NA                                                                                                                            | NA                          | Not specified                                                                          |
| France (Rénao only) (24)                | Sentinel      | National – 133 laboratories across metropolitan France                                                                                        | Patients referred by doctor who have received a microbiological NG diagnosis                                                  | NA                          | Not specified                                                                          |
| Germany (25)                            | Sentinel      | National – 23 laboratories chosen based on catchment area and number of NG tests per quarter                                                  | NA                                                                                                                            | NA                          | Not specified                                                                          |
| Italy (26)                              | Not available | National – 14 collaborating laboratories in 12 cities (6 in the North, 3 in Centre, 3 in the South)                                           | NA                                                                                                                            | NA                          | STD clinics                                                                            |

| Country/Region                               | System Type   | Coverage                                                                                                                                   | Population                                                           | Sampling                                                                                                             | Where isolates are collected                                                                    |
|----------------------------------------------|---------------|--------------------------------------------------------------------------------------------------------------------------------------------|----------------------------------------------------------------------|----------------------------------------------------------------------------------------------------------------------|-------------------------------------------------------------------------------------------------|
| Netherlands (27)                             | Other         | Subnational – 19 of a total 25 STI centres in the Netherlands                                                                              | All patients where antimicrobial susceptibility data were available  | NA                                                                                                                   | STI clinic                                                                                      |
| Russia (28)                                  | Other         | National – between 12 to 46 dermato-venereological dispensaries across Russia surveyed each year                                           | Patients with culture positive gonorrhoea                            | Mainly consecutive                                                                                                   | Dermato-venereological dispensaries                                                             |
| Scotland (22, 23)                            | Comprehensive | National – all referred isolates tested at Scottish Bacterial STI Reference Laboratory                                                     | All patients with gonorrhoea                                         | All cultures, and sample of NAAT patients where culture not available                                                | Primary care, sexual health services                                                            |
| Switzerland (29)                             | Other         | Subnational – North-Eastern Switzerland and Zurich                                                                                         | Patients with symptomatics of gonorrhoea                             | NA                                                                                                                   | Not specified                                                                                   |
| <b>WHO South East Asia Region</b>            |               |                                                                                                                                            |                                                                      |                                                                                                                      |                                                                                                 |
| India (30)                                   | Other         | Subnational – STD clinics in New Delhi (capital city), Pune, Mumbai, Hyderabad and Secunderabad                                            | Patients with symptomatics of gonorrhoea                             | NA                                                                                                                   | STD clinics                                                                                     |
| Nepal (31)                                   | Other         | National – 13 laboratories in hills and at ground level, none in mountainous areas                                                         | NA                                                                   | Consecutive                                                                                                          | Not specified                                                                                   |
| <b>WHO Western Pacific Region</b>            |               |                                                                                                                                            |                                                                      |                                                                                                                      |                                                                                                 |
| Australia (32)                               | Comprehensive | National                                                                                                                                   | All patients with gonorrhoea                                         | All cultures and sample of NAAT+ patients where culture not available                                                | Primary care, sexual health services, hospitals, private sites                                  |
| China (33)                                   | Sentinel      | Subnational - Clinics in 9 provinces (Guangdong, Guangxi, Hainan, Zhejiang, Sichuan, Tianjin, Xinjiang, Shanghai, Chongqing)               | All patients with gonorrhoea                                         | Culture following positive risk assessment                                                                           | Local dermatology and/or STD clinics                                                            |
| Hong Kong Special Administrative Region (34) | Other         | National                                                                                                                                   | All patients                                                         | NA                                                                                                                   | STD clinics                                                                                     |
| Japan (35)                                   | Other         | National - cooperating medical institutions in the regions of Hokkaido, Miyagi, Tokyo, Saitama, Shizuoka, Aichi, Gifu, Ishikawa, and Shiga | All patients with gonorrhoea                                         | NA                                                                                                                   | Medical institutions                                                                            |
| Korea (36)                                   | Other         | National – 35 urological clinics and other sites                                                                                           | Men or women with urethritis (male or female) and female sex workers | NA                                                                                                                   | Urological clinics, public health centres, secondary care hospitals and tertiary care hospitals |
| New Zealand (37, 38)                         | Comprehensive | National – data from laboratories in 10 out of 17 district health boards                                                                   | NA                                                                   | NA<br>Enhanced culturing for 2014-15 survey                                                                          | Not specified                                                                                   |
| Thailand (39)                                | Sentinel      | Subnational -2 sentinel sites and 2 reference laboratories in Bangkok, Thailand                                                            | Patients with symptomatics of gonorrhoea                             | Continually enrolls persons with confirmed gonorrhoea e.g. in Thailand all symptomatic male patients with urethritis | 1 hospital, 1 community clinic                                                                  |

2

3

4 **Supplementary Table S2b** System type, coverage, target population, sampling frame and collection sites for countries included in multi-country World  
 5 Health Organisation Multi-country Gonococcal Antimicrobial Surveillance Programs (GASP)

6

| Country/Region                              | System Type   | Coverage                                                                                                                                                                                                                                                                          | Population                     | Sampling <sup>2</sup> | Where isolates are collected                                                                        |
|---------------------------------------------|---------------|-----------------------------------------------------------------------------------------------------------------------------------------------------------------------------------------------------------------------------------------------------------------------------------|--------------------------------|-----------------------|-----------------------------------------------------------------------------------------------------|
| <b>Europe (40-43)</b>                       | Sentinel      | 27/30 countries <sup>1</sup>                                                                                                                                                                                                                                                      | NA                             |                       |                                                                                                     |
| <i>Austria</i>                              | Other         | National                                                                                                                                                                                                                                                                          |                                | Consecutive           | GPs, gynaecological clinics, urologists and sex worker monitoring                                   |
| <i>Belgium</i>                              | Comprehensive | National                                                                                                                                                                                                                                                                          |                                | Consecutive           | GPs, hospitals, STI clinics, gynaecological clinics                                                 |
| <i>Croatia</i>                              | Sentinel      | National                                                                                                                                                                                                                                                                          |                                | Consecutive           | STI clinics, DV clinics, GPs, hospitals                                                             |
| <i>Cyprus</i>                               | Unknown       | National                                                                                                                                                                                                                                                                          |                                | Unknown               | DV and urology clinics                                                                              |
| <i>Czech Republic</i>                       | Sentinel      | Not available                                                                                                                                                                                                                                                                     |                                | Consecutive           | DV clinic                                                                                           |
| <i>Denmark</i>                              | Comprehensive | National                                                                                                                                                                                                                                                                          |                                | Consecutive           | STI clinics, DV clinics, GPs, hospitals                                                             |
| <i>Estonia</i>                              | Other         | National                                                                                                                                                                                                                                                                          |                                | Consecutive           | All                                                                                                 |
| <i>Finland</i>                              |               | Not available                                                                                                                                                                                                                                                                     |                                | Consecutive           | Not available                                                                                       |
| <i>France</i>                               | Sentinel      | National                                                                                                                                                                                                                                                                          |                                | Consecutive           | GPs, STI clinics and hospitals                                                                      |
| <i>Germany</i>                              | Other         | Not available                                                                                                                                                                                                                                                                     |                                | Consecutive           | Medical practices, outpatients, hospital laboratories, public health departments and STI ambulances |
| <i>Greece</i>                               | Other         | National                                                                                                                                                                                                                                                                          |                                | Consecutive           | STI clinics and general hospitals                                                                   |
| <i>Hungary</i>                              | Sentinel      | Not available                                                                                                                                                                                                                                                                     |                                | Selectively           | STI clinics                                                                                         |
| <i>Iceland</i>                              | Comprehensive | National                                                                                                                                                                                                                                                                          |                                | Consecutive           | STI clinics, DV clinics, GPs, hospitals, private practitioners                                      |
| <i>Ireland</i>                              | Other         | National                                                                                                                                                                                                                                                                          |                                | Consecutive           | STI clinic and GPs                                                                                  |
| <i>Italy</i>                                | Comprehensive | Not available                                                                                                                                                                                                                                                                     |                                | Consecutive           | STI clinics, hospital, university/hospital microbiology units, DV clinics                           |
| <i>Latvia</i>                               | Other         | National                                                                                                                                                                                                                                                                          |                                | Consecutive           | STI clinics                                                                                         |
| <i>Luxembourg</i>                           | Other         | National                                                                                                                                                                                                                                                                          |                                | Consecutive           | GPs, hospitals, urology and family planning clinics                                                 |
| <i>Malta</i>                                | Comprehensive | National                                                                                                                                                                                                                                                                          |                                | Selectively           | STI clinic, GPs and hospitals                                                                       |
| <i>Netherlands</i>                          | Sentinel      | Subnational                                                                                                                                                                                                                                                                       |                                | Consecutive           | STI clinic                                                                                          |
| <i>Norway</i>                               | Unknown       | National                                                                                                                                                                                                                                                                          |                                | Consecutive           | STI clinics, GPs                                                                                    |
| <i>Poland</i>                               | Other         | Not available                                                                                                                                                                                                                                                                     |                                | Consecutive           | STI clinic                                                                                          |
| <i>Portugal</i>                             | Other         | National                                                                                                                                                                                                                                                                          |                                | Consecutive           | STI clinics, DV clinics, GPs, hospitals, urology and gynaecology clinics                            |
| <i>Slovakia</i>                             | Comprehensive | Not available                                                                                                                                                                                                                                                                     |                                | Consecutive           | DV, urology and gynaecology clinics                                                                 |
| <i>Slovenia</i>                             | Other         | Not available                                                                                                                                                                                                                                                                     |                                | Consecutive           | DV and STI clinics                                                                                  |
| <i>Spain</i>                                | Sentinel      | National                                                                                                                                                                                                                                                                          |                                | Consecutive           | STI clinics and hospitals                                                                           |
| <i>Sweden</i>                               | Comprehensive | National                                                                                                                                                                                                                                                                          |                                | Consecutive           | STI clinics                                                                                         |
| <i>United Kingdom</i>                       | Sentinel      | National                                                                                                                                                                                                                                                                          |                                | Consecutive           | GUM/STI clinics, GPs and outpatients                                                                |
| <b>Latin America and the Caribbean (44)</b> | Other         | Various - 23 out of 41 countries reported data at some level (national, local, ongoing periodic) between 1990 and 2011. Some countries have established national GASP networks (e.g. Argentina, Chile) while others reported from single major urban areas (Columbia, Venezuela). | NA                             | NA                    | Not specified                                                                                       |
| <b>South-East Asia (45)</b>                 | Other         | 6 countries out of 11 SEAR countries, 18 focal laboratories (4 Bhutan, 1 Indonesia, 10 India, 1 Myanmar, 1 Sri Lanka, 1 Thailand)                                                                                                                                                 | Various                        | NA                    | Mixed                                                                                               |
| <i>Bhutan</i>                               |               | Subnational - Thimpu, Gelephu, Mongar, Phuentsholing                                                                                                                                                                                                                              | STD clinic attendees           | As above              | STI clinics                                                                                         |
| <i>India</i>                                |               | Subnational - Delhi (4), Pune, Chennai, Hyderabad, Kolkata, Nagpur, Vadodra                                                                                                                                                                                                       | STD clinic attendees, MSM, FSW | As above              | STI clinics, other                                                                                  |

|                      |       |                                         |                                               |                      |                 |
|----------------------|-------|-----------------------------------------|-----------------------------------------------|----------------------|-----------------|
| <i>Indonesia</i>     |       | Not available                           | Referred by private clinics (community-based) | As above             | Private clinics |
| <i>Myanmar</i>       |       | Not available                           | FSW                                           | As above             | As above        |
| <i>Sri Lanka</i>     |       | Not available                           | STD clinic attendees                          | As above             | STI clinics     |
| <i>Thailand</i>      |       | Not available                           | Patients with STDs, FSW, MSM                  | As above             | As above        |
| Western Pacific (46) | Other | 12 out of 27 WPRO countries             | Primarily patients attending STI clinics      | Primarily unselected | Not specified   |
| Global (47)          | Other | 52 out of 193 WHO member states in 2014 | Various                                       | Various              | Not specified   |

7 Note: 1. Laboratories chosen by member states based on local epidemiology and convenience (e.g. laboratory with links to large STI clinic).

8 2. Collection September to November 2018, except for the United Kingdom (UK), which collected isolates between July and September 2018 to coincide with GRASP.

9

10 Supplementary Table S3: Anatomical site, reported cases and data collection variables in included surveillance systems

| Country/Region                     | Anatomical sites |                        |                    |                            | Isolate<br>s (n)  | Timeframe | % NG<br>cases | Patient characteristics                                                                                                                                                                                                                                                                                                                      | Linked                                                                               |
|------------------------------------|------------------|------------------------|--------------------|----------------------------|-------------------|-----------|---------------|----------------------------------------------------------------------------------------------------------------------------------------------------------------------------------------------------------------------------------------------------------------------------------------------------------------------------------------------|--------------------------------------------------------------------------------------|
|                                    | Male             |                        | Female             |                            |                   |           |               |                                                                                                                                                                                                                                                                                                                                              |                                                                                      |
|                                    | Anoge<br>nital   | Non-<br>anoge<br>nital | Anog<br>enita<br>l | Non-<br>Anog<br>enita<br>l |                   |           |               |                                                                                                                                                                                                                                                                                                                                              |                                                                                      |
| Ghana (2)                          | NA               | NA                     | NA                 | NA                         | 13                | 2012-2013 | NA            | Age and sex                                                                                                                                                                                                                                                                                                                                  | No                                                                                   |
| Kenya (3)                          | No               | No                     | Yes                | NA                         | 238               | 2012-2015 | NA            | NA                                                                                                                                                                                                                                                                                                                                           | NA                                                                                   |
| South Africa (4, 5)                | Yes              | No                     | Yes                | No                         | 4224 <sup>1</sup> | 2008-2015 | NA            | NA                                                                                                                                                                                                                                                                                                                                           | NA                                                                                   |
| Zimbabwe (6)                       | Yes              | No                     | No                 | No                         | 102               | 2015-2016 | NA            | Age                                                                                                                                                                                                                                                                                                                                          | No                                                                                   |
| Argentina (8)                      | NA               | NA                     | NA                 | NA                         | 1987              | 2009-2013 | NA            | NA                                                                                                                                                                                                                                                                                                                                           | NA                                                                                   |
| Côte d'Ivoire (7)                  | Yes              | No                     | Yes                | No                         | 212               | 2014-2017 | NA            | age, gender, sexual orientation, symptoms                                                                                                                                                                                                                                                                                                    |                                                                                      |
| Brazil (9)                         | Yes              | No                     | No                 | No                         | 550               | 2015-2016 | NA            | No complete or reliable clinical / epidemiological data available                                                                                                                                                                                                                                                                            | No                                                                                   |
| Canada (10, 11, 48)                | Yes              | Yes                    | Yes                | Yes                        | 4538              | 2016      | 19.1%         | Age and sex                                                                                                                                                                                                                                                                                                                                  | No                                                                                   |
| USA (12-14) (GISP)                 | Yes              | No                     | No                 | No                         | 5160              | 2018      | 1.5           | Age, race/ethnicity, sex, partner sex, previous diagnoses of gonorrhoea, HIV status, recent travel, and antimicrobial gonorrhoea treatment.                                                                                                                                                                                                  | Yes – abstracted from medical records by clinic staff and submitted each month using |
| USA (eGISP)(15, 16)                | Yes              | Yes                    | Yes                | Yes                        | 280               | 2017-2019 | NA            | In addition to above: Anatomic site of isolate collection, meningococcal vaccination history, and possible Neisseria meningitidis isolate                                                                                                                                                                                                    | Yes- eGISP patient ID link laboratory results and epidemiologic data                 |
| USA (SURRG)(15)                    | Yes              | Yes                    | Yes                | Yes                        | 1664 (in Indiana) | 2017-2019 | NA            | In addition to GISP, Sexual history                                                                                                                                                                                                                                                                                                          | Yes                                                                                  |
| Morocco (17)                       | Yes              | No                     | No                 | No                         | 72                | 2009      | NA            | Age                                                                                                                                                                                                                                                                                                                                          | No                                                                                   |
| Austria (18)                       | Yes              | Yes                    | Yes                | Yes                        | 3584              | 2010-2014 | NA            | Sample collection site (genital, rectal, pharyngeal), gender, age, sexual orientation, known gonococcal infections in the past, and possible coinfections with other STIs.                                                                                                                                                                   | No - questionnaire for anonymized data given to sites                                |
| Belarus (19)                       | Yes              | No                     | Yes                | No                         | 193               | 2010-2013 | NA            | Age and sex                                                                                                                                                                                                                                                                                                                                  | NA                                                                                   |
| England and Wales (GRASP) (20, 21) | Yes              | Yes                    | Yes                | Yes                        | 1284              | 2016      | 3.5           | Age, sex, patient residence, ethnicity, symptoms, previously diagnosed with NG, concurrent STI, site of infection, STI status, total partners in last 3 months, sex abroad, sexual orientation, plus PHE reporting form: date of attendance, attendance type, gender, age, ethnicity, COB, sexual orientation, concurrent STIs. From medical | Yes - to PHE reporting form                                                          |

| Country/Region                               | Anatomical sites |                |            |                | Isolates (n)      | Timeframe       | % NG cases | Patient characteristics                                                                                                                                                                                                                                                                                                                            | Linked                                             |
|----------------------------------------------|------------------|----------------|------------|----------------|-------------------|-----------------|------------|----------------------------------------------------------------------------------------------------------------------------------------------------------------------------------------------------------------------------------------------------------------------------------------------------------------------------------------------------|----------------------------------------------------|
|                                              | Male             |                | Female     |                |                   |                 |            |                                                                                                                                                                                                                                                                                                                                                    |                                                    |
|                                              | Anogenital       | Non-anogenital | Anogenital | Non-Anogenital |                   |                 |            |                                                                                                                                                                                                                                                                                                                                                    |                                                    |
|                                              |                  |                |            |                |                   |                 |            | records - DOB, previous NG diagnosis, diagnostic methods used, sites of infection and symptom presence, antibiotic treatment for NG/CT, TOC, sexual contacts in UK or abroad                                                                                                                                                                       |                                                    |
| England and Wales (SGSS) (49, 50)            | NA               | NA             | NA         | NA             | 17099             | 2016            | 47.2       | Age and sex                                                                                                                                                                                                                                                                                                                                        | No                                                 |
| France (Rénago only) (24)                    | Yes              | Yes            | Yes        | Yes            | 8649              | 2001-12         | NA         | sex, age, date of sample, anatomical site of sample, presence of symptoms, co-infection with another STI, probable country of infection, partner diagnosis, clinical site, specialisation of treating physician, type of laboratory and geographical area to which it belongs. The sexual orientation of the patient is not reported. <sup>4</sup> | No                                                 |
| Germany (25)                                 | Yes              | Yes            | Yes        | Yes            | 1654              | 2014-2015       | NA         | Site, district code, gender, year of birth is transmitted electronically with information on test results etc to RKI                                                                                                                                                                                                                               | No                                                 |
| Italy (26)                                   | Yes              | Yes            | Yes        | Yes            | 1688              | 2009-2016       | NA         | unlinked anonymous demographic, clinical and laboratory data received - include age, gender, sexual orientation, citizenship, site of infection, HIV status, previous diagnosis                                                                                                                                                                    | No                                                 |
| Netherlands (27)                             | Yes              | Yes            | Yes        | Yes            | 11678             | 2007-15         | 41.8       | Age, sex, sexual orientation, sexual behaviours, previous STI infection and co-infection.                                                                                                                                                                                                                                                          | No – obtained from patient file                    |
| Russia (28)                                  | Yes              | No             | Yes        | No             | 5038              | 2005-2016       | NA         | NA                                                                                                                                                                                                                                                                                                                                                 | NA                                                 |
| Scotland (22, 23)                            | NA               | NA             | NA         | NA             | 3168              | 2018            | 46.9       | Sex                                                                                                                                                                                                                                                                                                                                                | NA                                                 |
| Switzerland (29)                             | Yes              | Yes            | Yes        | Yes            | 318               | 1990, 2000-2012 | NA         | Specimen source, date specimen obtained, sex, age, and specimen site (2005 onwards)                                                                                                                                                                                                                                                                | NA                                                 |
| India (30)                                   | Yes              | No             | Yes        | No             | 124               | 2013-2016       | NA         | Age, sex, marital status, education, employment, sexual history (including FSW or MSM), past STIs, past treatment                                                                                                                                                                                                                                  | NA                                                 |
| Nepal (31)                                   | NA               | NA             | NA         | NA             | 181               | 1999-2012       | NA         | NA                                                                                                                                                                                                                                                                                                                                                 | NA                                                 |
| Australia (32)                               | Yes              | Yes            | Yes        | Yes            | 9668              | 2019            | 28         | Sex, country of acquisition, site of isolation, state of residence                                                                                                                                                                                                                                                                                 | No                                                 |
| China (33)                                   | Yes              | No             | Yes        | No             | 3849 <sup>2</sup> | 2013-2016       | 0.8        | Age, sex, sexual orientation, site, ethnicity, previous gonococcal infection                                                                                                                                                                                                                                                                       | Yes – extracted from outpatient records            |
| Hong Kong Special Administrative Region (34) | Yes              | No             | Yes        | No             | 947               | 2010            | NA         | Clinical and epidemiological information including sexual exposure history                                                                                                                                                                                                                                                                         | No – collected from patients attending STD clinics |

| Country/Region         | Anatomical sites |                |            |                | Isolates (n)     | Timeframe | % NG cases | Patient characteristics                                                                                                                                                                                                                                                                                         | Linked |
|------------------------|------------------|----------------|------------|----------------|------------------|-----------|------------|-----------------------------------------------------------------------------------------------------------------------------------------------------------------------------------------------------------------------------------------------------------------------------------------------------------------|--------|
|                        | Male             |                | Female     |                |                  |           |            |                                                                                                                                                                                                                                                                                                                 |        |
|                        | Anogenital       | Non-anogenital | Anogenital | Non-Anogenital |                  |           |            |                                                                                                                                                                                                                                                                                                                 |        |
| Japan (35)             | Yes              | Yes            | Yes        | Yes            | 2471             | 2000-2015 | NA         | NA                                                                                                                                                                                                                                                                                                              | NA     |
| Korea (36)             | NA               | NA             | NA         | NA             | 210              | 2011-2013 | NA         | Prescription data from Korean Health Insurance and Assessment Service, not linked to patient                                                                                                                                                                                                                    | No     |
| New Zealand (37, 38)   | Yes              | Yes            | Yes        | Yes            | 667              | 2014      | 22.0       | Date of birth, sex, specimen site                                                                                                                                                                                                                                                                               | No     |
| Thailand (39)          | Yes              | No             | No         | No             | 590              | NA        | NA         | Behavioural and clinical data e.g. demographics, prior antibiotic use, sexual behaviour history and treatment are collected on a case abstraction form                                                                                                                                                          | No     |
| Europe (40-43, 51, 52) | Yes              | Yes            | Yes        | Yes            | 3299             | 2018      |            | Date specimen obtained, specimen site, age, gender, mode of transmission, sexual orientation, previously diagnosed with NG and/or concurrent STI during current episode, place of residence, clinical service type, HIV status, probable country of infection, diagnostic test and treatment used. <sup>5</sup> | Yes    |
| <i>Austria</i>         |                  |                |            |                | 267              | 2018      | NA         |                                                                                                                                                                                                                                                                                                                 |        |
| <i>Belgium</i>         |                  |                |            |                | 180              | 2018      | 5          |                                                                                                                                                                                                                                                                                                                 |        |
| <i>Croatia</i>         |                  |                |            |                | 10               | 2018      | 75         |                                                                                                                                                                                                                                                                                                                 |        |
| <i>Czech Republic</i>  |                  |                |            |                | 95               | 2018      | 6          |                                                                                                                                                                                                                                                                                                                 |        |
| <i>Cyprus</i>          |                  |                |            |                | 5                | 2018      | NA         |                                                                                                                                                                                                                                                                                                                 |        |
| <i>Denmark</i>         |                  |                |            |                | 114              | 2018      | 6          |                                                                                                                                                                                                                                                                                                                 |        |
| <i>Estonia</i>         |                  |                |            |                | 7                | 2018      | 2          |                                                                                                                                                                                                                                                                                                                 |        |
| <i>Finland</i>         |                  |                |            |                | 168              | 2018      | NA         |                                                                                                                                                                                                                                                                                                                 |        |
| <i>France</i>          |                  |                |            |                | 109 <sup>3</sup> | 2018      | 1          |                                                                                                                                                                                                                                                                                                                 |        |
| <i>Germany</i>         |                  |                |            |                | 201              | 2018      | NA         |                                                                                                                                                                                                                                                                                                                 |        |
| <i>Greece</i>          |                  |                |            |                | 83               | 2018      | NA         |                                                                                                                                                                                                                                                                                                                 |        |
| <i>Hungary</i>         |                  |                |            |                | 89 <sup>3</sup>  | 2018      | 8          |                                                                                                                                                                                                                                                                                                                 |        |
| <i>Iceland</i>         |                  |                |            |                | 45               | 2018      | 37         |                                                                                                                                                                                                                                                                                                                 |        |
| <i>Ireland</i>         |                  |                |            |                | 200              | 2018      | 5          |                                                                                                                                                                                                                                                                                                                 |        |
| <i>Italy</i>           |                  |                |            |                | 100              | 2018      | 13         |                                                                                                                                                                                                                                                                                                                 |        |
| <i>Latvia</i>          |                  |                |            |                | 5                | 2018      | 5          |                                                                                                                                                                                                                                                                                                                 |        |
| <i>Luxembourg</i>      |                  |                |            |                | 1                | 2018      | 222        |                                                                                                                                                                                                                                                                                                                 |        |
| <i>Malta</i>           |                  |                |            |                | 25               | 2018      | 34         |                                                                                                                                                                                                                                                                                                                 |        |
| <i>Netherlands</i>     |                  |                |            |                | 402 <sup>3</sup> | 2018      | 4          |                                                                                                                                                                                                                                                                                                                 |        |
| <i>Norway</i>          |                  |                |            |                | 126              | 2018      | 10         |                                                                                                                                                                                                                                                                                                                 |        |
| <i>Poland</i>          |                  |                |            |                | 73               | 2018      | 18         |                                                                                                                                                                                                                                                                                                                 |        |
| <i>Portugal</i>        |                  |                |            |                | 122              | 2018      | 40         |                                                                                                                                                                                                                                                                                                                 |        |



| Country/Region                                               | Anatomical sites |                |            |                | Isolates (n) | Timeframes | % NG cases | Patient characteristics | Linked |
|--------------------------------------------------------------|------------------|----------------|------------|----------------|--------------|------------|------------|-------------------------|--------|
|                                                              | Male             |                | Female     |                |              |            |            |                         |        |
|                                                              | Anogenital       | Non-anogenital | Anogenital | Non-Anogenital |              |            |            |                         |        |
| <i>Slovakia</i>                                              |                  |                |            |                | 77           | 2018       | 40         |                         |        |
| <i>Slovenia</i>                                              |                  |                |            |                | 155          | 2018       | 131        |                         |        |
| <i>Spain</i>                                                 |                  |                |            |                | 189          | 2018       | 5          |                         |        |
| <i>Sweden</i>                                                |                  |                |            |                | 200          | 2018       | 6          |                         |        |
| <i>United Kingdom</i>                                        |                  |                |            |                | 251          | 2018       | 1          |                         |        |
| Latin America and the Caribbean (44)                         | NA               | NA             | NA         | NA             | 21592        | 1990-2011  | NA         | NA                      | NA     |
| South-East Asia (45)                                         | NA               | NA             | NA         | NA             | 4675         | 2009-2012  | NA         | Sex                     | NA     |
| <i>Bhutan</i>                                                |                  |                |            |                | 991          | 2009-2012  | NA         |                         |        |
| <i>India</i>                                                 |                  |                |            |                | 424          | 2009-2012  | NA         |                         |        |
| <i>Indonesia</i>                                             |                  |                |            |                | 24           | 2010-2012  | NA         |                         |        |
| <i>Myanmar</i>                                               |                  |                |            |                | 40           | 2011       | NA         |                         |        |
| <i>Sri Lanka</i>                                             |                  |                |            |                | 233          | 2009-2012  | NA         |                         |        |
| <i>Thailand</i>                                              |                  |                |            |                | 2949         | 2009-2012  | NA         |                         |        |
| Western Pacific(46)                                          | NA               | NA             | NA         | NA             | 8484         | 2011       | NA         | NA                      | NA     |
| Australia                                                    |                  |                |            |                | 4106         | 2011       | NA         |                         |        |
| Brunei Darussalem                                            |                  |                |            |                | 295          | 2011       | NA         |                         |        |
| China                                                        |                  |                |            |                | 1349         | 2011       | NA         |                         |        |
| Fiji                                                         |                  |                |            |                | 252          | 2011       | NA         |                         |        |
| Hong Kong SAR                                                |                  |                |            |                | 1225         | 2011       | NA         |                         |        |
| Japan                                                        |                  |                |            |                | 441          | 2011       | NA         |                         |        |
| Republic of Korea                                            |                  |                |            |                | 64           | 2011       | NA         |                         |        |
| New Caledonia                                                |                  |                |            |                | 166          | 2011       | NA         |                         |        |
| New Zealand                                                  |                  |                |            |                | 317          | 2011       | NA         |                         |        |
| The Philippines                                              |                  |                |            |                | 34           | 2011       | NA         |                         |        |
| Singapore                                                    |                  |                |            |                | 160          | 2011       | NA         |                         |        |
| Vietnam                                                      |                  |                |            |                | 75           | 2011       | NA         |                         |        |
| Global (47)                                                  | NA               | NA             | NA         | NA             | NA           | NA         | NA         | NA                      | NA     |
| WHO Antimicrobial Resistance Global Surveillance Report (53) | NA               | NA             | NA         | NA             | 21330        | Various    | NA         | NA                      | NA     |

11 1.2 geographic areas only

12 2.7 out of 9 provinces only

13 3. Sentinel epidemiological data

14 4. Because of the large proportion of missing data for four variables (presence of symptoms, co-infection with another STI, probable country of infection, and  
15 information on patient's partner infection status), the latter were used only for univariate analysis for descriptive purposes.

16 5. Note in 2015, completeness high for gender, age and site of infection, improving for mode of transmission previous NG, clinical service type, country of  
17 birth and probably country of infection, low e.g. for HIV status

18 #The data of % NG cases from Europe region were reported in the Euro-GASP report 2016, no data were reported for 2018; percentages above 100% suggest  
19 under-reporting of cases in epidemiological surveillance.

20 **Supplementary Table S4:** Laboratory procedures used in included surveillance systems

| Country             | Centralised   | Agar Dilution | E-test | Beta-lactamase | NG-MAST | Disk diffusion | NAAT | Criteria                      | CX <sup>1</sup> | CIP <sup>1</sup> | TET <sup>1</sup> | SPE <sup>1</sup> | PEN <sup>1</sup> | AZ <sup>1</sup> | CE <sup>1</sup> | OTH <sup>1</sup> |
|---------------------|---------------|---------------|--------|----------------|---------|----------------|------|-------------------------------|-----------------|------------------|------------------|------------------|------------------|-----------------|-----------------|------------------|
|                     |               |               |        |                |         |                |      |                               |                 |                  |                  |                  |                  |                 |                 |                  |
| Ghana (2)           | Decentralised |               |        |                |         |                |      | NA                            |                 |                  |                  |                  |                  |                 |                 |                  |
| Kenya (3)           | NA            |               |        |                |         |                |      | WHO                           |                 |                  |                  |                  |                  |                 |                 |                  |
| South Africa (4, 5) | NA            |               |        |                |         |                |      | CLSI, EUCAST for azithromycin |                 |                  |                  |                  |                  |                 |                 |                  |
| Côte d'Ivoire (7)   | Centralised   |               |        |                |         |                |      | CISI, WHO                     |                 |                  |                  |                  |                  |                 |                 |                  |
| Zimbabwe (6)        | Centralised   |               |        |                |         |                |      | CLSI, WHO                     |                 |                  |                  |                  |                  |                 |                 |                  |
| Argentina (8)       | Centralised   |               |        |                |         |                |      | CLSI, EUCAST for azithromycin |                 |                  |                  |                  |                  |                 |                 |                  |
| Brazil (9)          | Centralised   |               |        |                |         |                |      | CLSI, EUCAST for azithromycin |                 |                  |                  |                  |                  |                 |                 |                  |
| Canada (10, 11, 48) | Decentralised |               |        |                |         |                |      | CLSI                          |                 |                  |                  |                  |                  |                 |                 |                  |
| USA (GISP) (12-14)  | Decentralised |               |        |                |         |                |      | CLSI                          |                 |                  |                  |                  |                  |                 |                 |                  |
| USA (eGISP)(15, 16) | Decentralised |               |        |                |         |                |      | CLSI                          |                 |                  |                  |                  |                  |                 |                 |                  |
| USA (SURRG)(15)     | Decentralised |               |        |                |         |                |      | CLSI                          |                 |                  |                  |                  |                  |                 |                 |                  |
| Morocco (17)        | Decentralised |               |        |                |         |                |      | CLSI                          |                 |                  |                  |                  |                  |                 |                 |                  |
| Austria (18)        | Centralised   |               |        |                |         |                |      | CLSI, EUCAST                  |                 |                  |                  |                  |                  |                 |                 |                  |
| Belarus (19)        | Centralised   |               |        |                |         |                |      | EUCAST                        |                 |                  |                  |                  |                  |                 |                 |                  |

| Country                            | Centralised               | Agar Dilution | E-test | Beta-lactamase | NG-MAST | Disk diffusion | NAAT | Criteria                      | CX <sup>1</sup> | CIP <sup>1</sup> | TET <sup>1</sup> | SPE <sup>1</sup> | PEN <sup>1</sup> | AZ <sup>1</sup> | CE <sup>1</sup> | OTH <sup>1</sup> |
|------------------------------------|---------------------------|---------------|--------|----------------|---------|----------------|------|-------------------------------|-----------------|------------------|------------------|------------------|------------------|-----------------|-----------------|------------------|
|                                    |                           |               |        |                |         |                |      |                               |                 |                  |                  |                  |                  |                 |                 |                  |
| England and Wales (GRASP) (20, 21) | Centralised               |               |        |                |         |                |      | EUCAST                        |                 |                  |                  |                  |                  |                 |                 |                  |
| England and Wales (SGSS) (49, 50)  | Decentralised             |               |        |                |         |                |      | EUCAST                        |                 |                  |                  |                  |                  |                 |                 |                  |
| Scotland (22, 23)                  | Centralised               |               |        |                |         |                |      | EUCAST                        |                 |                  |                  |                  |                  |                 |                 |                  |
| France (Réngo only) (24)           | Centralised               |               |        |                |         |                |      | EUCAST                        |                 |                  |                  |                  |                  |                 |                 |                  |
| Germany (25)                       | Decentralised             |               |        |                |         |                |      | EUCAST                        |                 |                  |                  |                  |                  |                 |                 |                  |
| Italy (26)                         | Centralised               |               |        |                |         |                |      | EUCAST                        |                 |                  |                  |                  |                  |                 |                 |                  |
| Netherlands (27)                   | Centralised               |               |        |                |         |                |      | EUCAST                        |                 |                  |                  |                  |                  |                 |                 |                  |
| Russia (28)                        | Centralised               |               |        |                |         |                |      | CLSI, EUCAST for azithromycin |                 |                  |                  |                  |                  |                 |                 |                  |
| Switzerland (29)                   | Centralised               |               |        |                |         |                |      | EUCAST                        |                 |                  |                  |                  |                  |                 |                 |                  |
| India (30)                         | Decentralised             |               |        |                |         |                |      | CLSI                          |                 |                  |                  |                  |                  |                 |                 |                  |
| Nepal (31)                         | Decentralised             |               |        |                |         |                |      | NA                            |                 |                  |                  |                  |                  |                 |                 |                  |
| Thailand (39)                      | Decentralised             |               |        |                |         |                |      | NA                            |                 |                  |                  |                  |                  |                 |                 |                  |
| Australia (32)                     | Decentralised             |               |        |                |         |                |      | CDS                           |                 |                  |                  |                  |                  |                 |                 |                  |
| China (33)                         | Decentralised             |               |        |                |         |                |      | CLSI                          |                 |                  |                  |                  |                  |                 |                 |                  |
| Hong Kong SAR (34)                 | Centralised               |               |        |                |         |                |      | CLSI, EUCAST for azithromycin |                 |                  |                  |                  |                  |                 |                 |                  |
| Japan (35)                         | Centralised               |               |        |                |         |                |      | CLSI, EUCAST for azithromycin |                 |                  |                  |                  |                  |                 |                 |                  |
| Korea (36)                         | Centralised               |               |        |                |         |                |      | EUCAST, CLSI for cefpodoxime  |                 |                  |                  |                  |                  |                 |                 |                  |
| New Zealand (37, 38)               | Decentralised             |               |        |                |         |                |      | CLSI, EUCAST for azithromycin |                 |                  |                  |                  |                  |                 |                 |                  |
| Europe (40-43, 52)                 | Decentralised/centralised |               |        |                |         |                |      | EUCAST                        |                 |                  |                  |                  |                  |                 |                 |                  |
| <i>Austria</i>                     | Decentralised             |               |        |                |         |                |      | EUCAST                        |                 |                  |                  |                  |                  |                 |                 |                  |

| Country                              | Centralised   | Agar Dilution | E-test | Beta-lactamase | NG-MAST | Disk diffusion | NAAT | Criteria                                                            | CX <sup>1</sup> | CIP <sup>1</sup> | TET <sup>1</sup> | SPE <sup>1</sup> | PEN <sup>1</sup> | AZ <sup>1</sup> | CE <sup>1</sup> | OTH <sup>1</sup> |
|--------------------------------------|---------------|---------------|--------|----------------|---------|----------------|------|---------------------------------------------------------------------|-----------------|------------------|------------------|------------------|------------------|-----------------|-----------------|------------------|
|                                      |               |               |        |                |         |                |      |                                                                     |                 |                  |                  |                  |                  |                 |                 |                  |
| <i>Belgium</i>                       | Decentralised |               |        |                |         |                |      | EUCAST                                                              |                 |                  |                  |                  |                  |                 |                 |                  |
| <i>Croatia</i>                       | Centralised   |               |        |                |         |                |      | EUCAST                                                              |                 |                  |                  |                  |                  |                 |                 |                  |
| <i>Cyprus</i>                        | Decentralised |               |        |                |         |                |      | EUCAST                                                              |                 |                  |                  |                  |                  |                 |                 |                  |
| <i>Czech Republic</i>                | Centralised   |               |        |                |         |                |      | EUCAST                                                              |                 |                  |                  |                  |                  |                 |                 |                  |
| <i>Denmark</i>                       | Decentralised |               |        |                |         |                |      | EUCAST                                                              |                 |                  |                  |                  |                  |                 |                 |                  |
| <i>Estonia</i>                       | Centralised   |               |        |                |         |                |      | EUCAST                                                              |                 |                  |                  |                  |                  |                 |                 |                  |
| <i>Finland</i>                       | Decentralised |               |        |                |         |                |      | EUCAST                                                              |                 |                  |                  |                  |                  |                 |                 |                  |
| <i>France</i>                        | Decentralised |               |        |                |         |                |      | EUCAST                                                              |                 |                  |                  |                  |                  |                 |                 |                  |
| <i>Germany</i>                       | Centralised   |               |        |                |         |                |      | EUCAST                                                              |                 |                  |                  |                  |                  |                 |                 |                  |
| <i>Greece</i>                        | Decentralised |               |        |                |         |                |      | EUCAST                                                              |                 |                  |                  |                  |                  |                 |                 |                  |
| <i>Hungary</i>                       | Centralised   |               |        |                |         |                |      | EUCAST                                                              |                 |                  |                  |                  |                  |                 |                 |                  |
| <i>Iceland</i>                       | Decentralised |               |        |                |         |                |      | EUCAST                                                              |                 |                  |                  |                  |                  |                 |                 |                  |
| <i>Ireland</i>                       | Decentralised |               |        |                |         |                |      | EUCAST                                                              |                 |                  |                  |                  |                  |                 |                 |                  |
| <i>Italy</i>                         | Decentralised |               |        |                |         |                |      | EUCAST                                                              |                 |                  |                  |                  |                  |                 |                 |                  |
| <i>Latvia</i>                        | Centralised   |               |        |                |         |                |      | EUCAST                                                              |                 |                  |                  |                  |                  |                 |                 |                  |
| <i>Malta</i>                         | Decentralised |               |        |                |         |                |      | EUCAST                                                              |                 |                  |                  |                  |                  |                 |                 |                  |
| <i>Netherlands</i>                   | Decentralised |               |        |                |         |                |      | EUCAST                                                              |                 |                  |                  |                  |                  |                 |                 |                  |
| <i>Norway</i>                        | Decentralised |               |        |                |         |                |      | EUCAST                                                              |                 |                  |                  |                  |                  |                 |                 |                  |
| <i>Poland</i>                        | Centralised   |               |        |                |         |                |      | EUCAST                                                              |                 |                  |                  |                  |                  |                 |                 |                  |
| <i>Portugal</i>                      | Decentralised |               |        |                |         |                |      | EUCAST                                                              |                 |                  |                  |                  |                  |                 |                 |                  |
| <i>Slovakia</i>                      | Centralised   |               |        |                |         |                |      | EUCAST                                                              |                 |                  |                  |                  |                  |                 |                 |                  |
| <i>Slovenia</i>                      | Decentralised |               |        |                |         |                |      | EUCAST                                                              |                 |                  |                  |                  |                  |                 |                 |                  |
| <i>Spain</i>                         | Decentralised |               |        |                |         |                |      | EUCAST                                                              |                 |                  |                  |                  |                  |                 |                 |                  |
| <i>Sweden</i>                        | Decentralised |               |        |                |         |                |      | EUCAST                                                              |                 |                  |                  |                  |                  |                 |                 |                  |
| <i>United Kingdom</i>                | Decentralised |               |        |                |         |                |      | EUCAST                                                              |                 |                  |                  |                  |                  |                 |                 |                  |
| <i>Luxembourg</i>                    | Centralised   |               |        |                |         |                |      | EUCAST                                                              |                 |                  |                  |                  |                  |                 |                 |                  |
| Latin America and the Caribbean (44) | Decentralised |               |        |                |         |                |      | CLSI except azithromycin breakpoint based on "established criteria" |                 |                  |                  |                  |                  |                 |                 |                  |

| Country                  | Centralised   | Agar Dilution | E-test | Beta-lactamase | NG-MAST | Disk diffusion | NAAT | Criteria  | CX <sup>1</sup> | CIP <sup>1</sup> | TET <sup>1</sup> | SPE <sup>1</sup> | PEN <sup>1</sup> | AZ <sup>1</sup> | CE <sup>1</sup> | OTH <sup>1</sup> |
|--------------------------|---------------|---------------|--------|----------------|---------|----------------|------|-----------|-----------------|------------------|------------------|------------------|------------------|-----------------|-----------------|------------------|
|                          |               |               |        |                |         |                |      |           |                 |                  |                  |                  |                  |                 |                 |                  |
| South-East Asia (45)     | Decentralised |               |        |                |         |                |      | CLSI, CDS |                 |                  |                  |                  |                  |                 |                 |                  |
| <i>Bhutan</i>            | Decentralised |               |        |                |         |                |      | CLSI, CDS |                 |                  |                  |                  |                  |                 |                 |                  |
| <i>India</i>             | Decentralised |               |        |                |         |                |      | CLSI, CDS |                 |                  |                  |                  |                  |                 |                 |                  |
| <i>Indonesia</i>         | Centralised   |               |        |                |         |                |      | CLSI      |                 |                  |                  |                  |                  |                 |                 |                  |
| <i>Myanmar</i>           | Centralised   |               |        |                |         |                |      | CDS       |                 |                  |                  |                  |                  |                 |                 |                  |
| <i>Sri Lanka</i>         | Centralised   |               |        |                |         |                |      | CDS       |                 |                  |                  |                  |                  |                 |                 |                  |
| <i>Thailand</i>          | Centralised   |               |        |                |         |                |      | CLSI, CDS |                 |                  |                  |                  |                  |                 |                 |                  |
| Western Pacific (46)     | Decentralised | NA            | NA     | NA             | NA      | NA             |      | NA        |                 |                  |                  |                  |                  |                 |                 |                  |
| <i>Australia</i>         | Decentralised |               |        |                |         |                |      |           |                 |                  |                  |                  |                  |                 |                 |                  |
| <i>Brunei Darussalem</i> | NA            |               |        |                |         |                |      |           |                 |                  |                  |                  |                  |                 |                 |                  |
| <i>China</i>             | NA            |               |        |                |         |                |      |           |                 |                  |                  |                  |                  |                 |                 |                  |
| <i>Fiji</i>              | NA            |               |        |                |         |                |      |           |                 |                  |                  |                  |                  |                 |                 |                  |
| <i>Hong Kong SAR</i>     | NA            |               |        |                |         |                |      |           |                 |                  |                  |                  |                  |                 |                 |                  |
| <i>Japan</i>             | NA            |               |        |                |         |                |      |           |                 |                  |                  |                  |                  |                 |                 |                  |
| <i>Republic of Korea</i> | NA            |               |        |                |         |                |      |           |                 |                  |                  |                  |                  |                 |                 |                  |
| <i>New Caledonia</i>     | NA            |               |        |                |         |                |      |           |                 |                  |                  |                  |                  |                 |                 |                  |
| <i>New Zealand</i>       | NA            |               |        |                |         |                |      |           |                 |                  |                  |                  |                  |                 |                 |                  |
| <i>The Philippines</i>   | NA            |               |        |                |         |                |      |           |                 |                  |                  |                  |                  |                 |                 |                  |
| <i>Singapore</i>         | NA            |               |        |                |         |                |      |           |                 |                  |                  |                  |                  |                 |                 |                  |
| <i>Vietnam</i>           | NA            |               |        |                |         |                |      |           |                 |                  |                  |                  |                  |                 |                 |                  |
| Global (47)              | Decentralised | NA            | NA     | NA             | NA      | NA             |      | NA        |                 |                  |                  |                  |                  |                 |                 |                  |

21

22 \*CX – ceftriaxone, CIP – ciprofloxacin, TET- tetracycline, SPE-spectinomycin, PEN-penicillin, AZ – azithromycin, CE – Cefixime, OTH – Other

23 Cip/Pen/Cro/AZI are the GASP ABS – so all GASP labs generally test and report to the WHO

24

- 25 1. World Health Organization. National antimicrobial resistance surveillance systems and participation in the Global Antimicrobial Resistance  
26 Surveillance System (GLASS): Core components checklist and questionnaire. Geneva; WHO; 2016. Contract No.: WHO/DGO/AMR/2016.5.
- 27 2. Duplessis C, Puplampu N, Nyarko E, Carroll J, Dela H, Mensah A, et al. Gonorrhoea surveillance in Ghana, Africa. *Military medicine*. 2015;180(1):17-22.
- 28 3. Omolo MJ, Pole L, Mwangi I, Kimani J, Anzala O, Oloo J, et al. P2.30 Survey of antimicrobial resistance in clinical neisseria gonorrhoeae isolated over  
29 a period of four years in Nairobi - Kenya. *Sex Transm Infect*. 2017;93.
- 30 4. Kularatne R, Maseko V, Gumede L, Radebe F, Kufa-Chakezha T. P3.186 *Neisseria gonorrhoeae* antimicrobial resistance surveillance in  
31 Johannesburg, South Africa. *Sexually Transmitted Infections*. 2017;93(Suppl 2):A162-A.
- 32 5. Kularatne R MV, Gumede L, Radebe F, Kufa-Chakezha T,. *Neisseria Gonorrhoeae* antimicrobial resistance surveillance in Gauteng Province, South  
33 Africa. *Communicable Diseases Surveillance Bulletin*. 2016;14 (3): 56-64.
- 34 6. Latif AS, Gwanzura L, Machiha A, Ndowa F, Tarupiwa A, Gudza-Mugabe M, et al. Antimicrobial susceptibility in *Neisseria gonorrhoeae* isolates from  
35 five sentinel surveillance sites in Zimbabwe, 2015–2016. *Sexually Transmitted Infections*. 2017.
- 36 7. Yeo A, Kouame-Blavo B, Kouame CE, Ouattara A, Yao AC, Gbede BD, et al. Establishment of a Gonococcal Antimicrobial Surveillance Programme, in  
37 Accordance With World Health Organization Standards, in Cote d'Ivoire, Western Africa, 2014-2017. *Sex Transm Dis*. 2019;46(3):179-84.
- 38 8. Gianecini R, de las Mercedes Romero M, Oviedo C, Vacchino M, Galarza P, Romero MdLM. Emergence and Spread of *Neisseria gonorrhoeae* Isolates  
39 With Decreased Susceptibility to Extended-Spectrum Cephalosporins in Argentina, 2009 to 2013. *Sex Transm Dis*. 2017;44(6):351-5.
- 40 9. Bazzo ML, Golfetto L, Gaspar PC, Pires AF, Ramos MC, Franchini M, et al. First nationwide antimicrobial susceptibility surveillance for *Neisseria*  
41 *gonorrhoeae* in Brazil, 2015-16. *The Journal of antimicrobial chemotherapy*. 2018.
- 42 10. Martin I, Sawatzky P, Allen V, Lefebvre B, Hoang L, Naidu P, et al. Multidrug-resistant and extensively drug-resistant *Neisseria gonorrhoeae* in Canada,  
43 2012-2016. *Can Commun Dis Rep*. 2019;45(2-3):45-53.
- 44 11. Gratrix J, Kamruzzaman A, Martin I, Smyczek P, Read R, Bertholet L, et al. Surveillance for Antimicrobial Resistance in Gonorrhoea: The Alberta Model,  
45 2012(-)2016. *Antibiotics (Basel)*. 2018;7(3).
- 46 12. Kirkcaldy RD, Harvey A, Papp JR, del Rio C, Soge OO, Holmes KK, et al. *Neisseria gonorrhoeae* antimicrobial susceptibility surveillance - The Gonococcal  
47 Isolate Surveillance Project, 27 sites, United States, 2014. *MMWR Surveillance Summaries*. 2016;65(7):1-24.
- 48 13. Mann LMMPH, Kirkcaldy RDMD, Papp JRP, Torrone EAPM. Susceptibility of *Neisseria gonorrhoeae* to Gentamicin-Gonococcal Isolate Surveillance  
49 Project, 2015-2016. *Sex Transm Dis*. 2018;45(2):96.
- 50 14. US Centers for Disease Control and Prevention. Gonococcal Isolate Surveillance Program Protocol May 2016. 2016.
- 51 15. Kersh EN, Pham CD, Papp JR, Myers R, Steece R, Kubin G, et al. Expanding U.S. Laboratory Capacity for *Neisseria gonorrhoeae* Antimicrobial  
52 Susceptibility Testing and Whole-Genome Sequencing through the CDC's Antibiotic Resistance Laboratory Network. *J Clin Microbiol*. 2020;58(4).
- 53 16. Prevention CfDca. Gonococcal Isolate Surveillance Project (GISP) and Enhanced GISP (eGISP). Atlanta, Georgia Centers for Disease Control and  
54 Prevention 2020.
- 55 17. Hancali A, Ndowa F, Bellaji B, Bennani A, Kettani A, Charof R, et al. Antimicrobial resistance monitoring in *Neisseria gonorrhoeae* and strategic use of  
56 funds from the Global Fund to set up a systematic Moroccan gonococcal antimicrobial surveillance programme. *Sex Transm Infect*. 2013;89(Suppl 4):i24-i7.
- 57 18. Sary A, Heller-Vitouch C, Binder M, Geusau A, Sary G, Rappersberger K, et al. Gonococcal infections in Austria: a long-term observation of prevalence  
58 and resistance profiles from 1999 to 2014. *J*. 2015;13(11):1136-45.
- 59 19. Lebedzeu F, Golparian D, Titov L, Pankratava N, Glazkova S, Shimanskaya I, et al. Antimicrobial susceptibility/resistance and NG-MAST characterisation  
60 of *Neisseria gonorrhoeae* in Belarus, Eastern Europe, 2010-2013. *BMC Infectious Diseases*. 2015;15:29.

- 61 20. Clifton S, Bolt H, Mohammed H, Town K, Furegato M, Cole M, et al. Prevalence of and factors associated with MDR *Neisseria gonorrhoeae* in England  
62 and Wales between 2004 and 2015: analysis of annual cross-sectional surveillance surveys. *Journal of Deaf Studies & Deaf Education*. 2018;23(2):923-32.
- 63 21. Health Protection Agency. Gonococcal Resistance to Antimicrobials Surveillance Programme (GRASP) Action Plan for England and Wales: Informing  
64 the Public Health Response. 2013.
- 65 22. Health Protection Scotland and NHS Lothian. Scottish Bacterial Sexually Transmitted Infections Reference Laboratory User Manual 2015. 2015.
- 66 23. Jill Shepherd, Lesley Wallace, Martin McHugh, Beth Cullen, Cameron R, Goldberg D. Gonococcal antibiotic surveillance in Scotland (GASS): prevalence,  
67 patterns and trends in 2018. *National Services Scotland*; 2019.
- 68 24. La Ruche G, Goubard A, Bercot B, Cambau E, Semaille C, Sednaoui P. Gonococcal infections and emergence of gonococcal decreased susceptibility to  
69 cephalosporins in France, 2001 to 2012. *Euro Surveill: Bulletin Europeen sur les Maladies Transmissibles = European Communicable Disease Bulletin*.  
70 2014;19(34):28.
- 71 25. Buder S, Dudareva S, Jansen K, Loenenbach A, Nikisins S, Sailer A, et al. Antimicrobial resistance of *Neisseria gonorrhoeae* in Germany: low levels of  
72 cephalosporin resistance, but high azithromycin resistance. *BMC Infect Dis*. 2018;18(1):44.
- 73 26. Stefanelli P, Vescio MF, Landini MP, Dal Conte I, Matteelli A, Cristaudo A, et al. Time trend analysis (2009-2016) of antimicrobial susceptibility in  
74 *Neisseria gonorrhoeae* isolated in Italy following the introduction of the combined antimicrobial therapy. *PLoS ONE*. 2017;12(12):e0189484.
- 75 27. Hofstraat SH, Gotz HM, van Dam AP, van der Sande MA, van Benthem BH. Trends and determinants of antimicrobial susceptibility of *Neisseria*  
76 *gonorrhoeae* in the Netherlands, 2007 to 2015. *Euro Surveill*. 2018;23(36).
- 77 28. Kubanov A, Solomka V, Plakhova X, Chestkov A, Petrova N, Shaskolskiy B, et al. Summary and Trends of the Russian Gonococcal Antimicrobial  
78 Surveillance Programme, 2005 to 2016. *J Clin Microbiol*. 2019;57(6).
- 79 29. Kovari H, de Melo Oliveira MD, Hauser P, Lauchli S, Meyer J, Weber R, et al. Decreased susceptibility of *Neisseria gonorrhoeae* isolates from  
80 Switzerland to Cefixime and Ceftriaxone: antimicrobial susceptibility data from 1990 and 2000 to 2012. *BMC Infectious Diseases*. 2013;13:603.
- 81 30. Kulkarni SV, Bala M, Muqeeth SA, Sasikala G, Nirmalkar AP, Thorat R, et al. Antibiotic susceptibility pattern of *Neisseria gonorrhoeae* strains isolated  
82 from five cities in India during 2013-2016. *Journal of medical microbiology*. 2018;67(1):22-8.
- 83 31. Malla S, Dumre SP, Geeta S, Palpasa K, Bhupraj R, Anowar H, et al. The challenges and successes of implementing a sustainable antimicrobial resistance  
84 surveillance programme in Nepal. *BMC Public Health*. 2014;14(269).
- 85 32. Lahra MM, Enriquez RP, George CRR. Australian Gonococcal Surveillance Programme Annual Report, 2019. *Communicable Diseases Intelligence*  
86 2020;44.
- 87 33. Yin YP, Han Y, Dai XQ, Zheng HP, Chen SC, Zhu BY, et al. Susceptibility of *Neisseria gonorrhoeae* to azithromycin and ceftriaxone in China: A  
88 retrospective study of national surveillance data from 2013 to 2016. *Plos Medicine*. 2018;15(2).
- 89 34. Lo JY, Ho KM, Lo AC. Surveillance of gonococcal antimicrobial susceptibility resulting in early detection of emerging resistance. *Journal of Antimicrobial*  
90 *Chemotherapy*. 2012;67(6):1422-6.
- 91 35. Yasuda M, Hatazaki K, Ito S, Kitanohara M, Yoh M, Kojima M, et al. Antimicrobial Susceptibility of *Neisseria gonorrhoeae* in Japan from 2000 to 2015.  
92 *Sex Transm Dis*. 2017;44(3):149-53.
- 93 36. Lee H, Unemo M, Kim H, Seo Y, Lee K, Chong Y. Emergence of decreased susceptibility and resistance to extended-spectrum cephalosporins in  
94 *Neisseria gonorrhoeae* in Korea. *Journal of Antimicrobial Chemotherapy*. 2015;70(9):2536-42.
- 95 37. Institute for Environmental Science and Research Limited. Antimicrobial resistance and molecular epidemiology of *Neisseria gonorrhoeae* in New  
96 Zealand, 2014-15. 2015.

- 97 38. Institute for Environmental Science and Research Limited. Sexually Transmitted Infections in New Zealand: Annual Surveillance Report 2014. Porirua,  
98 New Zealand; 2015
- 99 39. Sirivongrangsorn P, Girdthep N, Sukwicha W, Buasakul P, Tongtoyai J, Weston E, et al. The first year of the global Enhanced Gonococcal Antimicrobial  
100 Surveillance Programme (EGASP) in Bangkok, Thailand, 2015-2016. *PloS one*. 2018;13(11):e0206419.
- 101 40. European Centre for Disease Control and Prevention. Response plan to control and manage the threat of multi-drug resistant gonorrhoea in Europe.  
102 . 2012.
- 103 41. European Centre for Disease Control and Prevention. Gonococcal antimicrobial susceptibility surveillance in Europe, 2015. 2017.
- 104 42. Cole MJ, Spiteri G, Jacobsson S, Woodford N, Tripodo F, Amato-Gauci AJ, et al. Overall Low Extended-Spectrum Cephalosporin Resistance but high  
105 Azithromycin Resistance in *Neisseria gonorrhoeae* in 24 European Countries, 2015. *BMC Infectious Diseases*. 2017;17(1):617.
- 106 43. Spiteri G, Cole M, Unemo M, Hoffmann S, Ison C, Laar Mvd. The European Gonococcal Antimicrobial Surveillance Programme (Euro-GASP) - a sentinel  
107 approach in the European Union (EU)/European Economic Area (EEA). (Special Issue: Gonococcal antimicrobial resistance.). *Sex Transm Infect*. 2013;89(Suppl.  
108 4).
- 109 44. Dillon J-AR, Trecker MA, Thakur SD, Fiorito S, Galarza P, Trigos Carvallo ME, et al. Two decades of the gonococcal antimicrobial surveillance program  
110 in South America and the Caribbean: challenges and opportunities. *Sex Transm Infect*. 2013;89(Suppl 4):iv36-iv41.
- 111 45. Bala M, Kakran M, Singh V, Sood S, Ramesh V, Members of WHO GSN. Monitoring antimicrobial resistance in *Neisseria gonorrhoeae* in selected  
112 countries of the WHO South-East Asia Region between 2009 and 2012: a retrospective analysis. *Sex Transm Infect*. 2013;89 Suppl 4:iv28-iv35.
- 113 46. Lahra MM, Lo Y, Whiley DM. Gonococcal antimicrobial resistance in the Western Pacific Region. (Special Issue: Gonococcal antimicrobial resistance.).  
114 *Sex Transm Infect*. 2013;89(Suppl. 4).
- 115 47. Wi T, Lahra MM, Ndowa F, Bala M, Dillon JR, Ramon-Pardo P, et al. Antimicrobial resistance in *Neisseria gonorrhoeae*: Global surveillance and a call  
116 for international collaborative action. *PLoS medicine*. 2017;14(7):e1002344.
- 117 48. Martin I, Sawatzky P, Liu G, Allen V, Lefebvre B, Hoang L, et al. Decline in Decreased Cephalosporin Susceptibility and Increase in Azithromycin  
118 Resistance in *Neisseria gonorrhoeae*, Canada. *Emerging infectious diseases*. 2016;22(1):65-7.
- 119 49. Public Health England. Antimicrobial resistance in *Neisseria gonorrhoeae* in England and Wales: Key findings from the Gonococcal Resistance to  
120 Antimicrobials Surveillance Programme (GRASP 2018). London; 2019.
- 121 50. Public Health England. Surveillance of antimicrobial resistance in *Neisseria gonorrhoeae*  
122 Key findings from the Gonococcal Resistance to Antimicrobials Surveillance Programme (GRASP). 2016.
- 123 51. Day MJ, Spiteri G, Jacobsson S, Woodford N, Amato-Gauci AJ, Cole MJ, et al. Stably high azithromycin resistance and decreasing ceftriaxone  
124 susceptibility in *Neisseria gonorrhoeae* in 25 European countries, 2016. *BMC Infect Dis*. 2018;18(1):609.
- 125 52. European Centre for Disease Prevention and Control. Gonococcal antimicrobial susceptibility surveillance in Europe-Results summary 2018.  
126 Stockholm ECDC; 2020.
- 127 53. World Health Organisation. Antimicrobial Resistance Global Surveillance Report. Geneva; 2014.

128
